# Supplementary material for: The screening and identification of DNA barcode sequences for Rehmannia
Source: PubMed Central journal article supplement (PMC6872558; doi:10.1038/s41598-019-53752-8), 2019-11-21
Supplement: 41598_2019_53752_MOESM1_ESM.pdf [file 41598_2019_53752_MOESM1_ESM.pdf]

# The screening and identification of DNA barcode sequences for *Rehmannia*

Hongying Duan, Wanshen Wang, Yunpeng Zeng, Mengmeng Guo, Yanqing Zhou\*

## Supplementary information

Fig.S1 PCR amplification results of ITS in *Rehmannia*

Fig.S2 PCR amplification results of ITS2 in *Rehmannia*

Fig.S3 PCR amplification results of *rbcL* in *Rehmannia*

Fig.S4 PCR amplification results of *matK* in *Rehmannia*

Fig.S5 PCR amplification results of *psbA-trnH* in *Rehmannia*

Fig.S6 Phylogenetic tree of *Rehmannia* based on *matK*

The bootstrap scores (1000 replicates) were shown ( $\geq 50\%$ ) for each branch.

Fig.S7 Phylogenetic tree of *Rehmannia* based on *psbA-trnH*

The bootstrap scores (1000 replicates) were shown ( $\geq 50\%$ ) for each branch.

Fig.S8 Phylogenetic tree of *Rehmannia* based on ITS2+*psbA-trnH*

The bootstrap scores (1000 replicates) were shown ( $\geq 50\%$ ) for each branch.

Table S1 The efficiency of PCR amplification for candidate barcodes

Table S2 The similarity comparison of candidate barcodes in *Rehmannia* by BLAST

Table S3 Wilcoxon signed rank test for interspecific variations between different sequences

Table S4 Wilcoxon signed rank test for intraspecific variations between different sequences

Table S5 Primers used in this study

Table S6 PCR reaction conditions used in this study

## Supplementary information

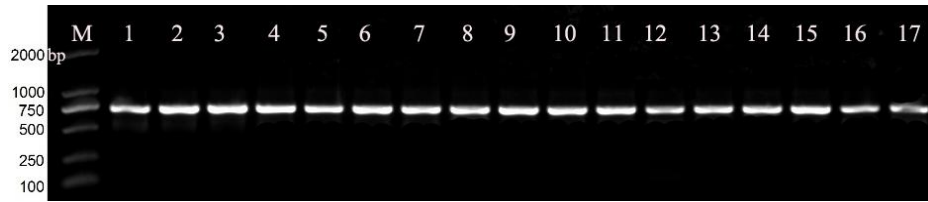

Fig.S1 PCR amplification results of ITS in *Rehmannia*

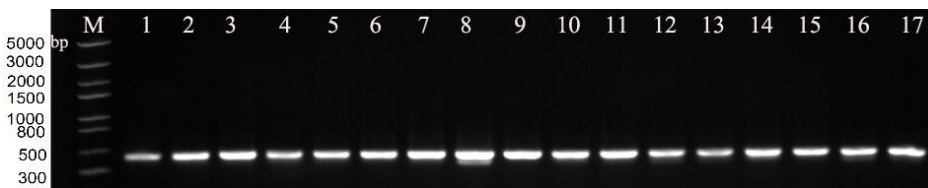

Fig.S2 PCR amplification results of ITS2 in *Rehmannia*

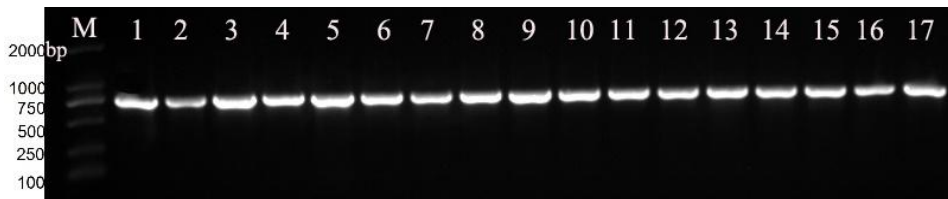

Fig.S3 PCR amplification results of *rbcL* in *Rehmannia*

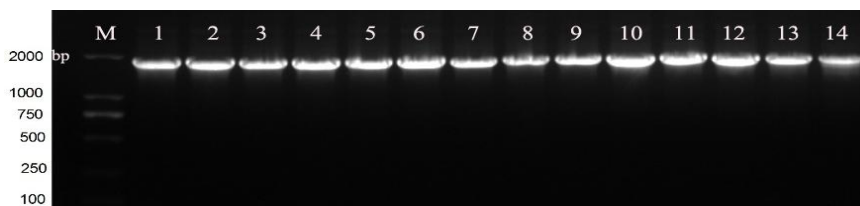

Fig.S4 PCR amplification results of *matK* in *Rehmannia*

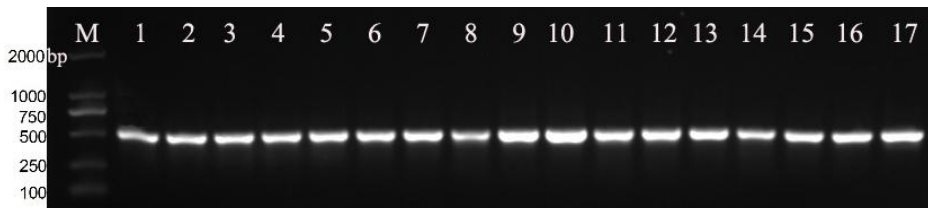

Fig.S5 PCR amplification results of *psbA-trnH* in *Rehmannia*

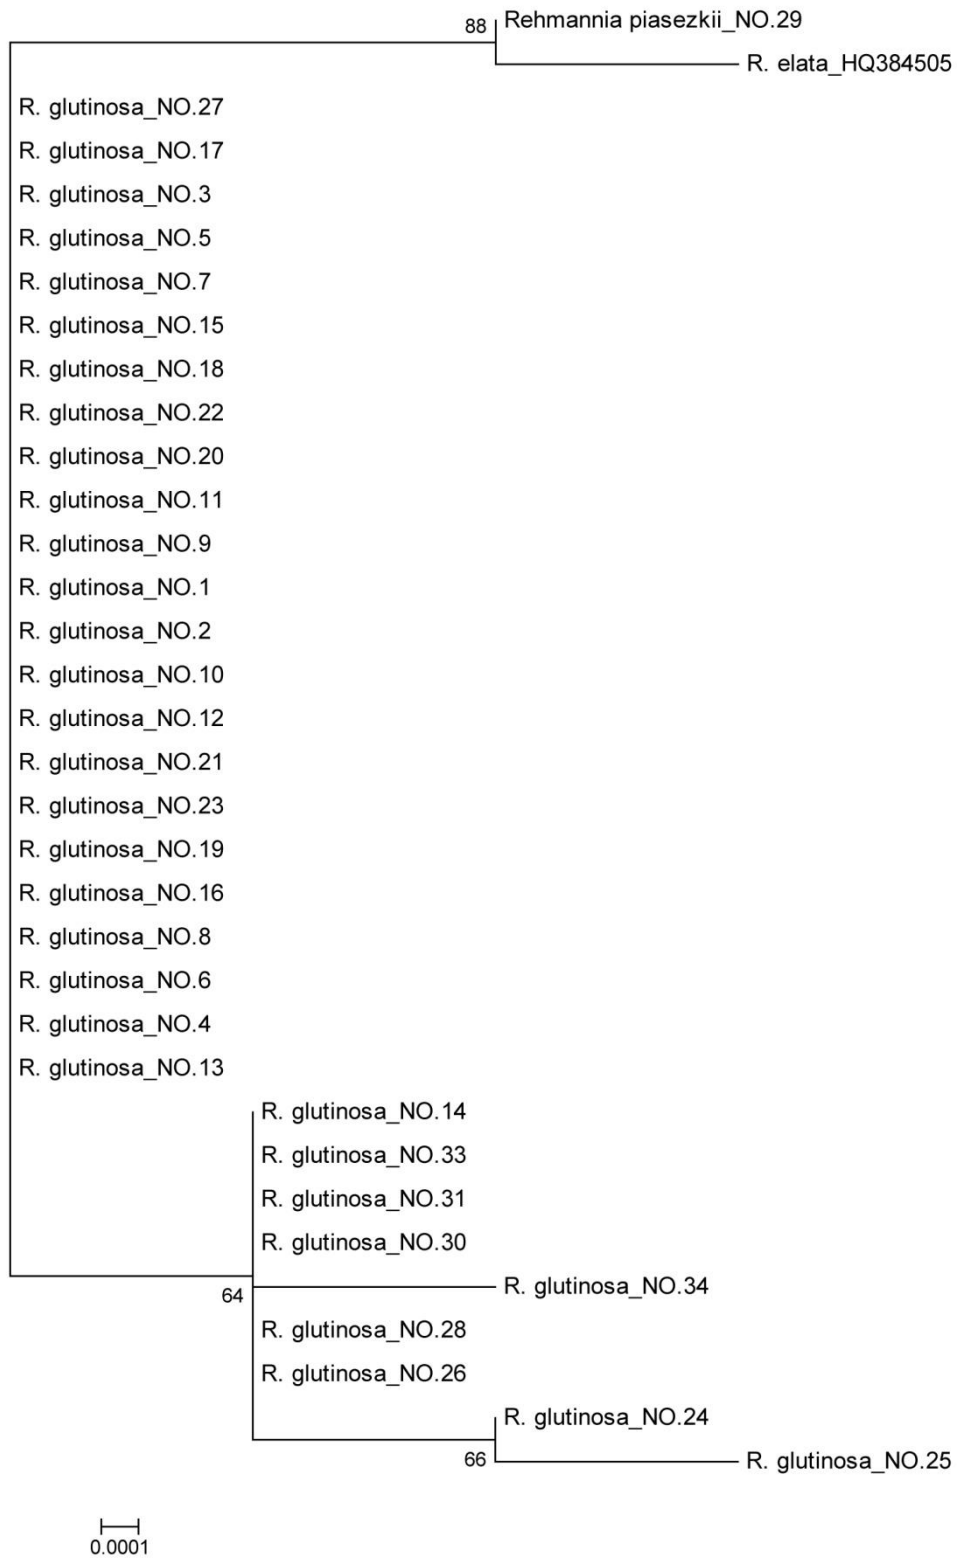

Fig.S6 Phylogenetic tree of *Rehmannia* based on *matK*

The bootstrap scores (1000 replicates) were shown ( $\geq 50\%$ ) for each branch.

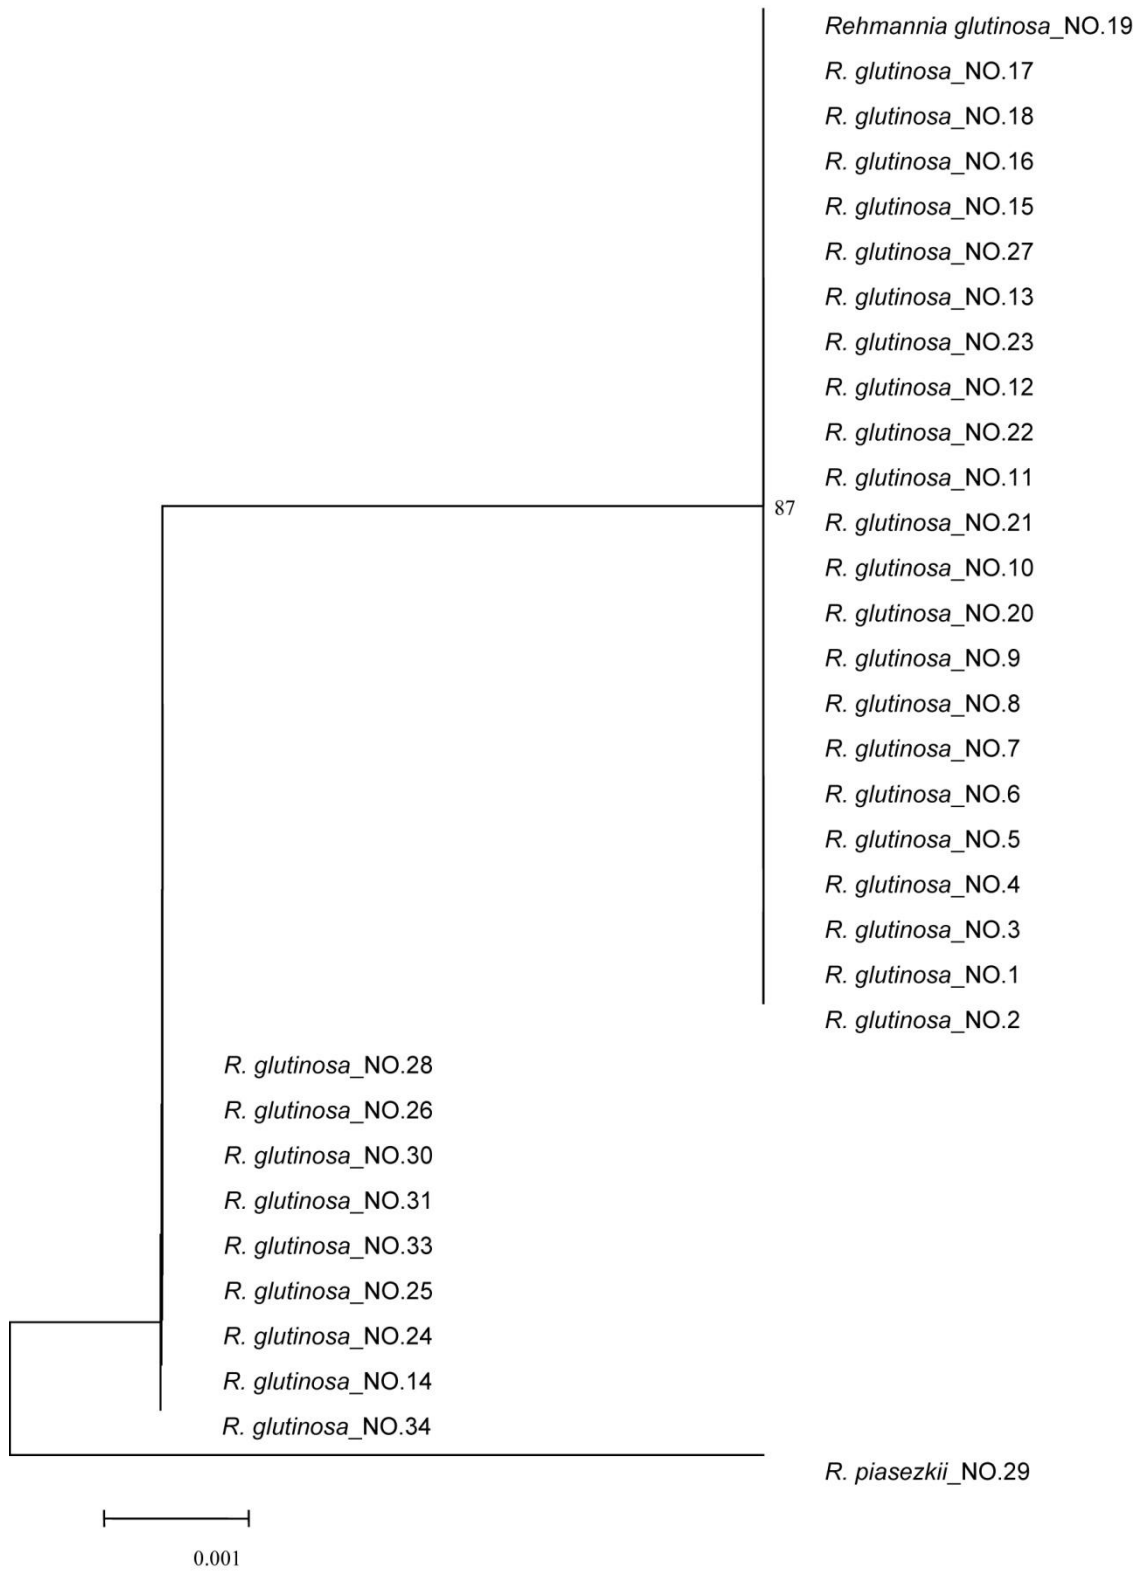

Fig.S7 Phylogenetic tree of *Rehmannia* based on *psbA-trnH*

The bootstrap scores (1000 replicates) were shown ( $\geq 50\%$ ) for each branch.

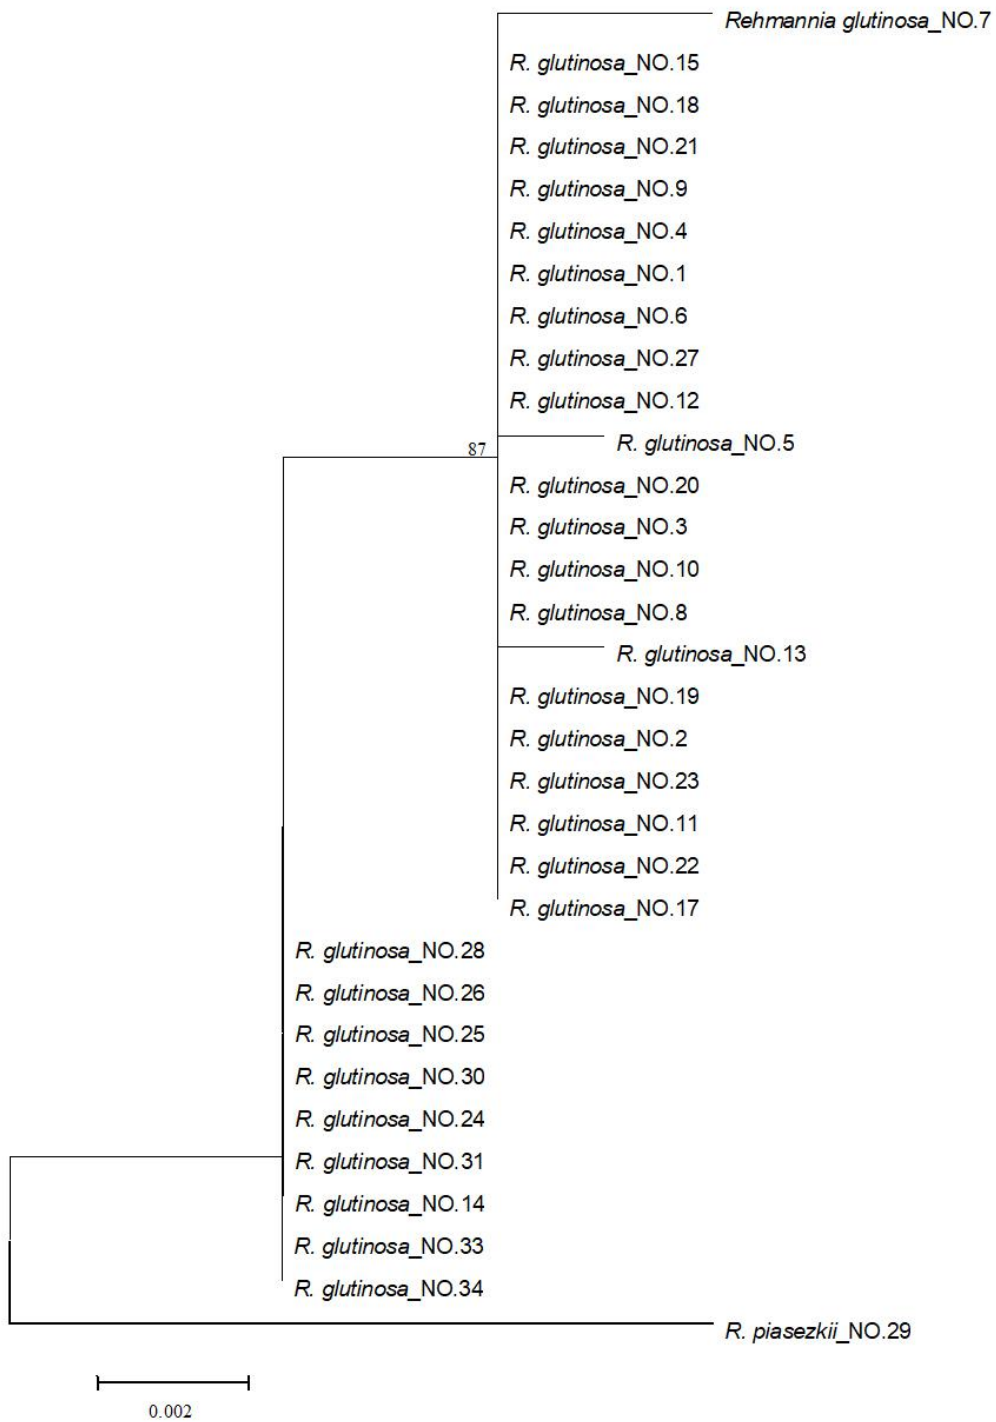

Fig.S8 Phylogenetic tree of *Rehmannia* based on ITS2+*psbA-trnH*

The bootstrap scores (1000 replicates) were shown ( $\geq 50\%$ ) for each branch.

Table S1 The efficiency of PCR amplification for candidate barcodes

| Marker           | Amplification rate | Sequencing rate | Sequences obtained rate |
|------------------|--------------------|-----------------|-------------------------|
| ITS              | 100                | 100             | 100                     |
| ITS2             | 100                | 100             | 100                     |
| <i>rbcL</i>      | 100                | 100             | 100                     |
| <i>matK</i>      | 100                | 100             | 100                     |
| <i>psbA-trnH</i> | 100                | 100             | 100                     |

Table S2 The similarity comparison of candidate barcodes in *Rehmannia* by BLAST

| Marker      | NO.                 | Species                                        | ID                                         | Identity% |
|-------------|---------------------|------------------------------------------------|--------------------------------------------|-----------|
| ITS         | 1                   | <i>R. glutinosa</i> cultivar Dihuang 85-5      | EU787017                                   | 100       |
|             |                     | <i>R. glutinosa</i> voucher XZ-2004-04-005     | EF363674                                   | 100       |
|             |                     | <i>R. glutinosa</i> voucher HAAS-DH85-5        | EU810384                                   | 100       |
|             | 14/28               | <i>R. glutinosa</i> voucher PS1518MT01         | FJ980430                                   | 100       |
|             |                     | <i>R. glutinosa</i> cultivar No.1 Shennongshan | FJ770237                                   | 100       |
|             |                     | <i>R. glutinosa</i> voucher XZ-2004-04-005     | EF363674                                   | 99        |
|             |                     | 29                                             | <i>R. piasezkii</i> voucher XZ-2004-04-001 | EF363670  |
|             | <i>R. piasezkii</i> |                                                | DQ069316                                   | 99        |
|             | <i>R. elata</i>     |                                                | HQ384505                                   | 98        |
|             | <i>matK</i>         |                                                |                                            |           |
| <i>rbcL</i> |                     | <i>R. chingii</i>                              | EF544598                                   | 99        |
|             |                     | <i>R. glutinosa</i>                            | AJ247615                                   | 99        |
|             |                     | <i>R. elata</i>                                | HQ384874                                   | 100       |
|             |                     | <i>R. henryi</i>                               | FJ172722                                   | 100       |
|             |                     | <i>R. piasezkii</i>                            | FJ172721                                   | 99        |
|             |                     | <i>R. glutinosa</i>                            | FJ172725                                   | 100       |

Table S3 Wilcoxon signed rank test for interspecific variations between different sequences

| W <sup>+</sup>   | W <sup>-</sup>   | Inter relative ranks, n, P value                              | Result                         |
|------------------|------------------|---------------------------------------------------------------|--------------------------------|
| ITS2             | ITS              | W <sup>+</sup> =231533, W <sup>-</sup> =11720, n=699, P=0.000 | ITS2>ITS                       |
| ITS              | <i>psbA-trnH</i> | W <sup>+</sup> =496, W <sup>-</sup> =0, n=31, P=0.000         | ITS> <i>psbA-trnH</i>          |
| <i>psbA-trnH</i> | <i>matK</i>      | W <sup>+</sup> =528, W <sup>-</sup> =0, n=32, P=0.000         | <i>psbA-trnH</i> > <i>matK</i> |
| <i>rbcL</i>      | <i>matK</i>      | W <sup>+</sup> =0, W <sup>-</sup> =2145, n=65, P=0.000        | <i>rbcL</i> < <i>matK</i>      |

Table S4 Wilcoxon signed rank test for intraspecific variations between different sequences

| $W^+$       | $W^-$            | Inter relative ranks, n, $P$ value                  | Result                         |
|-------------|------------------|-----------------------------------------------------|--------------------------------|
| ITS2        | ITS              | $W^+=638743$ , $W^-=807107$ , $n=2151$ , $P=0.000$  | ITS2<ITS                       |
| ITS         | <i>psbA-trnH</i> | $W^+=25273.5$ , $W^-=27052.5$ , $n=465$ , $P=0.593$ | ITS= <i>psbA-trnH</i>          |
| <i>matK</i> | <i>psbA-trnH</i> | $W^+=242.5$ , $W^-=25863.5$ , $n=496$ , $P=0.000$   | <i>matK</i> < <i>psbA-trnH</i> |
| <i>rbcL</i> | <i>matK</i>      | $W^+=460$ , $W^-=21068$ , $n=496$ , $P=0.000$       | <i>rbcL</i> < <i>matK</i>      |

Table S5 Primers used in this study

| Marker           | Primer    | Direction | Sequence 5'→3'                  |
|------------------|-----------|-----------|---------------------------------|
| ITS              | T5        | F         | GGAAGTAAAAGTCGTAACAAGG          |
|                  | T4        | R         | TCCTCCGCTTATTGATATGC            |
| ITS2             | T3        | F         | GCATCGATGAAGAACGCAGC            |
|                  | T4        | R         | TCCTCCGCTTATTGATATGC            |
| <i>rbcL</i>      | 1F        | F         | ATGTCACCACAAACAGAAAC            |
|                  | 724R      | R         | TCGCATGTACCTGCAGTAGC            |
|                  | 636F      | F         | GCGTTGGAGAGATCGTTTCT            |
|                  | 1368R     | R         | CTTTCCAAATTCACAAGCAGCA          |
| <i>rbcL</i>      | 5'F       | F         | ATGTCACCACAAACAGAACTAAAGC       |
|                  | z895R     | R         | ACCATGATTCTTCTGCCTATCAATAACTGC  |
|                  | z674F     | F         | TTATAAATCACAAGCCGAAACTGGTGAAATC |
|                  | 3'R       | R         | CTTTTAGTAAAAGATTGGGCCGAG        |
| <i>matK</i>      | 1F        | F         | ACTGTATCGCACTATGTATCA           |
|                  | trnk2R    | R         | AACTAGTCGGATGGAGTAG             |
|                  | trnk3914F | F         | GGGGTTGCTAACTCAACGG             |
| <i>psbA-trnH</i> | trnHf_05  | F         | CGCGCATGGTGGATTCACAATCC         |
|                  | psbA 3'f  | R         | GTTATGCATGAACGTAATGCTC          |

Table S6 PCR reaction conditions used in this study

| Marker           | Primer     | Condition                                                |
|------------------|------------|----------------------------------------------------------|
| ITS              | T5         | 94°C 3min, 30cycles (94°C 30s, 46°C 30s, 72°C 60s), 72°C |
|                  | T4         | 10min                                                    |
| ITS2             | T3         | 94°C 3min, 30cycles (94°C 30s, 48°C 30s, 72°C 60s), 72°C |
|                  | T4         | 10min                                                    |
| <i>rbcL</i>      | 5'F        | 94°C 4min, 30cycles (94°C 30s, 60°C 30s, 72°C 60s), 72°C |
|                  | z895R      | 10min                                                    |
|                  | z674F      | 94°C 4min, 30cycles (94°C 30s, 52°C 30s, 72°C 60s), 72°C |
|                  | 3'R        | 10min                                                    |
| <i>rbcL</i>      | 1F         | 94°C 3min, 30cycles (94°C 30s, 50°C 30s, 72°C 1min),     |
|                  | 724R       | 72°C 10min                                               |
|                  | 636f       | 94°C 3min, 30cycles (94°C 30s, 50°C 30s, 72°C 1min),     |
|                  | 1368r      | 72°C 10min                                               |
| <i>matK</i>      | 1F         | 94°C 5min, 30cycles (94°C 90s, 48.6°C 2min, 72°C 1min),  |
|                  | trnk 2R    | 72°C 15min                                               |
|                  | trnk 3914F | 94°C 4min, 35cycles (94°C 30s, 48°C 1min, 72°C 2min),    |
|                  | trnk 2R    | 72°C 10min                                               |
| <i>psbA-trnH</i> | psbA 3'f   | 94°C 4min, 35cycles (94°C 30s, 55°C 30s, 72°C 1min),     |
|                  | trnHf_05   | 72°C 10min                                               |
